# Supplementary material for: Tropical Drosophila ananassae of wet-dry seasons show cross resistance to heat, drought and starvation
Source: PubMed Central journal article supplement (PMC5703618; doi:10.1242/bio.029728), 2017-11-15
Supplement: biolopen-6-029728-s1.pdf [file biolopen-6-029728-s1.pdf]

**Table S1.** Results of ANOVA for treatment groups (control vs acclimated) and due to two seasons as well as sexes for three stress related traits in *D. ananassae* reared under wet or dry season specific simulated condition.

|            | Heat knockdown |          |            | Desiccation resistance |            | Starvation resistance |             |
|------------|----------------|----------|------------|------------------------|------------|-----------------------|-------------|
|            | df             | MS       | F          | MS                     | F          | MS                    | F           |
| Sn         | 1              | 20869.35 | 4989.72*** | 1122.338               | 1891.64*** | 54481.07              | 5230.33***  |
| T          | 1              | 37200.60 | 8894.41*** | 701.784                | 1182.82*** | 29260.42              | 2809.08***  |
| S          | 1              | 17069.70 | 4081.09*** | 487.920                | 822.37***  | 13053.75              | 1253.19***  |
| Sn × T     | 1              | 160.07   | 38.27***   | 5.221                  | 8.80**     | 15714.02              | 15.08.59*** |
| Sn × S     | 1              | 1622.40  | 387.91***  | 4.48.3                 | 7.56**     | 4558.82               | 437.66***   |
| T × S      | 1              | 2172.02  | 519.31***  | 28.428                 | 47.914***  | 1926.67               | 184.97***   |
| Sn × T × S | 1              | 4183.35  | 1000.21*** | 3.361                  | 5.664*     | 2693.40               | 258.57***   |
| Error      | 232            | 4.18     |            | 0.593                  |            | 10.42                 |             |

Sn = Season; T = Treatment; S = Sex; \*\*\* $p < 0.001$ ; \*\* $p < 0.01$ ; \* $p < 0.5$

**Table S2.** Results of ANOVA for treatment groups (control vs acclimated) and due to two seasons as well as sexes for three energy metabolites in *D. ananassae* reared under wet or dry season specific simulated condition.

|            | df  | Trehalose |             | Proline  |             | Total body lipids |           |
|------------|-----|-----------|-------------|----------|-------------|-------------------|-----------|
|            |     | MS        | F           | MS       | F           | MS                | F         |
| Sn         | 1   | 8044.35   | 10800.51*** | 150016.6 | 296127.2*** | 467625.7          | 80.611*** |
| S          | 1   | 232.04    | 311.54***   | 2076.2   | 4098.4***   | 218282.7          | 37.628*** |
| T          | 3   | 7342.36   | 9858.00***  | 14674.9  | 28967.7***  | 375481.4          | 64.727*** |
| Sn × T     | 3   | 2522.78   | 3387.13***  | 123.3    | 243.4***    | 87318.1           | 15.052*** |
| Sn × S     | 1   | 1101.22   | 1478.52***  | 15360.3  | 30320.6***  | 68066.6           | 11.733*** |
| T × S      | 3   | 148.15    | 198.91***   | 6.90     | 13.7***     | 14502.1           | 2.499**   |
| Sn × T × S | 3   | 174.54    | 234.35***   | 33.50    | 66.2***     | 11547.5           | 1.99*     |
| Error      | 464 | 0.744     |             | 0.507    |             | 5800.98           |           |

Sn = Season; T = Treatment; S = Sex; \*\*\* $p < 0.001$ ; \*\* $p < 0.01$ ; \* $p < 0.5$ ; Unit= ( $\mu\text{g mg}^{-1} \text{fly}^{-1}$ )
